# Supplementary material for: Comprehensive mapping of immune perturbations associated with aplastic anemia
Source: Research Square preprint supplement (doi:10.21203/rs.3.rs-4089406/v1), 2024-03-15
Supplement: Supplementary file 1 [file 58cf1d388a5b2259a81e7b58.docx]

Table S1. Clinical characteristic of patient in AA

| Baseline characteristic | |
| --- | --- |
| Gender |  |
| Male, NO. (%) | 12（44%） |
| Female, NO. (%) | 15（56%） |
| Median age (years, range) | 32（17-59） |
| Cell counts (median range) |  |
| WBC(×109/L) | 2.05（0.23~4.61） |
| RBC(×1012/L) | 2.17（1.34~3.14） |
| ANC(×109/L) | 0.69（0.01~2.97） |
| ARC(×109/L) | 21.9(4~88.7) |
| ALC(×109/L) | 1.22（0.15~3.4） |
| PLT(×109/L) | 21（4~56） |
| Hb(g/L) | 66（44-112） |

AA: aplastic anemia; WBC: white blood cell; RBC: red blood cell; ANC: absolute neutrophile granulocyte; ALC: absolute lymphocyte; ARC: absolute reticulocyte; PLT: platelet; Hb: hemoglobin.

Table S2 Antibodies used in flow cytometry

| Antibody | Fluorophore | Clone | Company |
| --- | --- | --- | --- |
| CD3 | PE-cy7 | OKT3 | TONBO |
| CD4 | BUV496 | SK3 | BD |
| CD8 | PerCP-cy5.5 | OKT8 | TONBO |
| CD19 | PE-Cy5 | HIB19 | BD |
| CD14 | APC | M5E2 | BD |
| CD15 | BV605 | W6D3 | Biolegend |
| CD16 | BV786 | 3G8 | Biolegend |
| HLA-DR | APC-cy7 | L243 | TONBO |
| CCR7 | AF700 | G043H7 | Biolegend |
| CD45RA | BV510 | HI100 | Biolegend |
| CD127 | BV421 | A019D5 | Biolegend |
| CD56 | PE594 | B159 | BD |
| CD38 | PE | HB7 | TONBO |
| CD11b | BUV396 | ICRF44 | BD |
| CD25 | FITC | M-A251 | BD |
| CD11c | BV711 | 3.9 | Biolegend |
| Nkp30 | BV605 | P30-15 | Biolegend |
| Nkp44 | PE | P44-8 | Biolegend |
| Nkp46 | FITC | 9E-2 | Biolegend |
| NGK2A | APC-Cy7 | S19004C | Biolegend |
| NGK2C | BV421 | 134591 | BD |
| NGK2D | PerCP-Cy5.5 | 1D11 | eBioscience |
| CD107a | APC-750 | H4A3 | Biolegend |
| CD57 | PerCP-Cy5.5 | HNK-1 | Biolegend |
| T-bet | Percp5.5 | 4B10 | Biolegend |
| Granzyme B | BV421 | QA18A28 | Biolegend |
| Perforin | BV711 | dG-9 | Biolegend |
| Ki67 | BV650 | B56 | BD |
| PD-1 | BV421 | NAT105 | Biolegend |
| IFN-γ | FITC | 4S.B3 | Biolegend |
